# Supplementary material for: The Arabidopsis GPR1 Gene Negatively Affects Pollen Germination, Pollen Tube Growth, and Gametophyte Senescence
Source: Int J Mol Sci. 2017 Jun 21;18(6):1303. doi: 10.3390/ijms18061303 (PMC5486124; doi:10.3390/ijms18061303)
Supplement: Supplementary file 1 [file ijms-18-01303-s001.pdf]

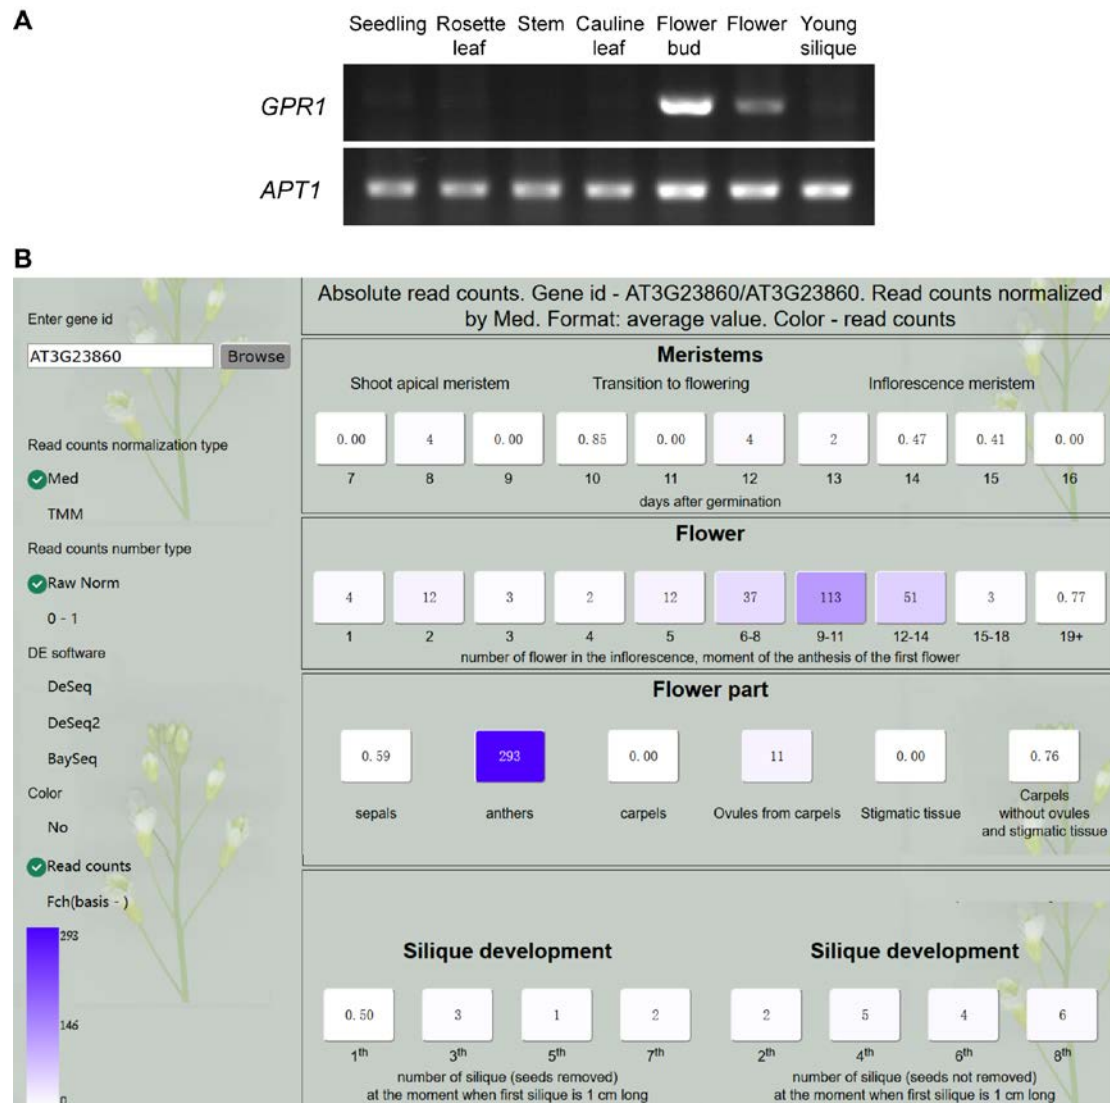

**Supplemental Figure S1.** Transcription levels of *GPR1* in various Arabidopsis tissues. **(A)** *GPR1* expression analysis by RT-PCR. *APT1* was used as internal control. **(B)** *GPR1* expression profile based on RNA-seq analysis. Data were downloaded from the “Transcriptome Variation Analysis” database (TRAVA, <http://travadb.org/>).

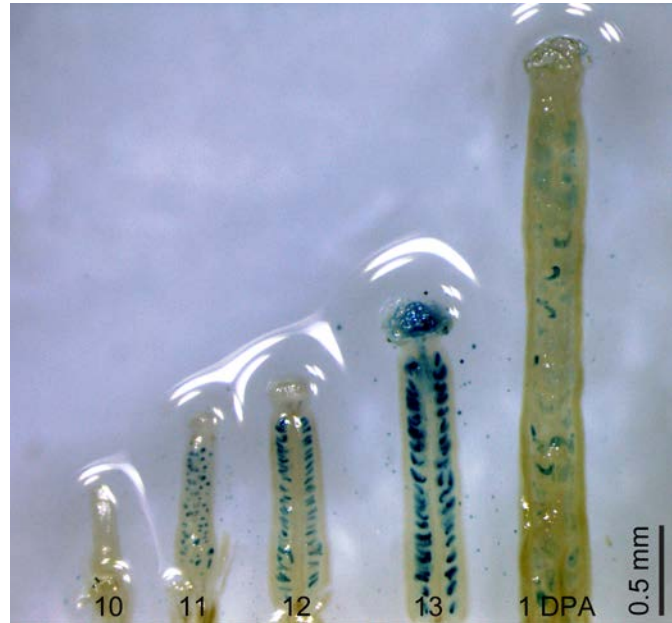

**Supplemental Figure S2.** Expression of *ProGPR1:GUS* in pistils and young silique at 1 day post anthesis (DPA). GUS staining was undetectable in pistil of stage 10 flower. Increasing GUS signals were detected in ovules of stage 11 to 13 pistils, and then decreased in 1 DPA silique.

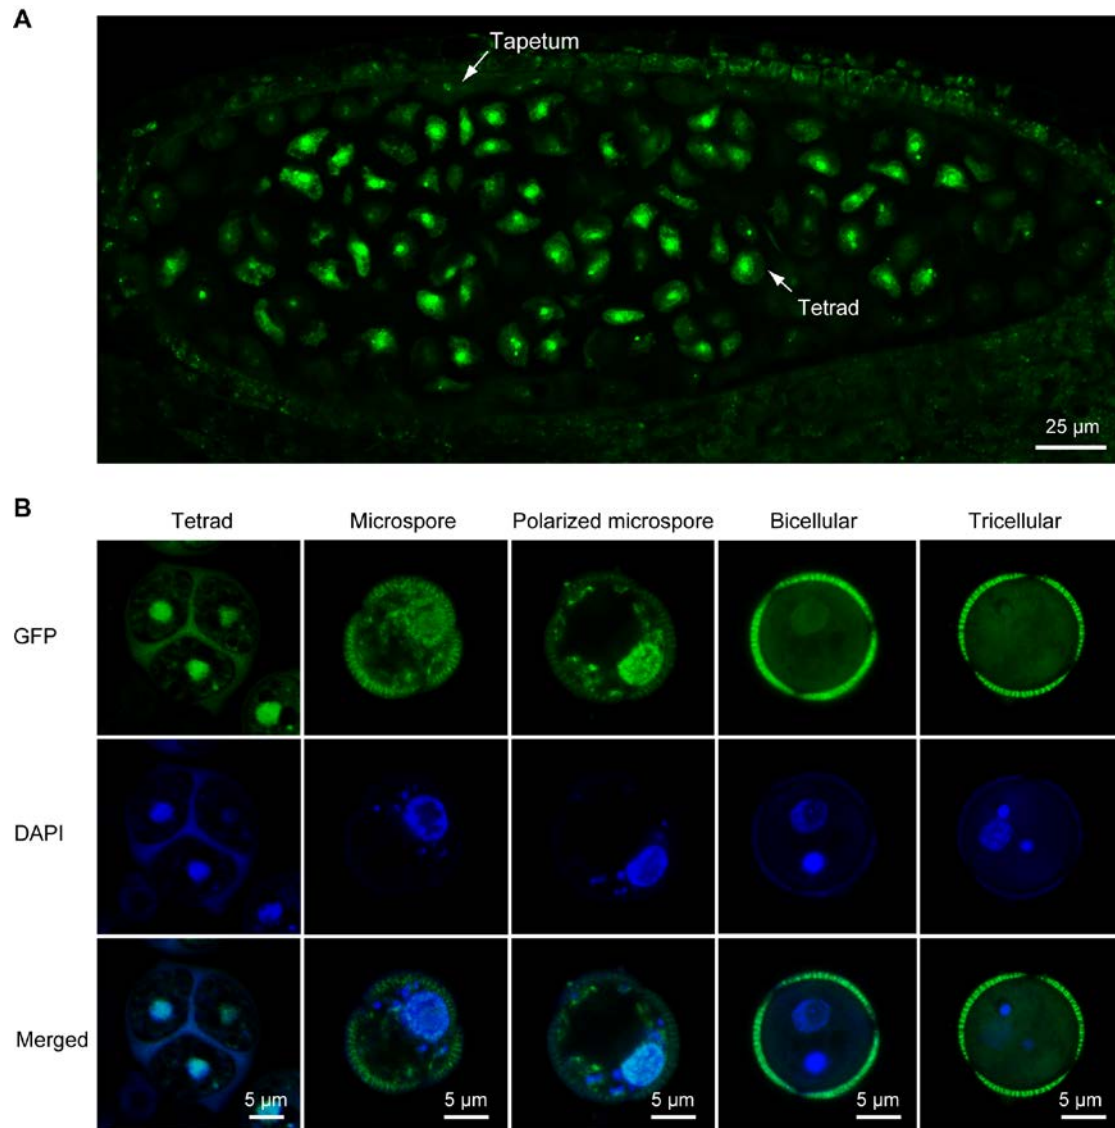

**Supplemental Figure S3.** *ProGPR1:GPR1-EGFP* expression in anther at stage 7 and during pollen development. **(A)** In stage 7 anther, GPR1-EGFP fluorescence was detected in tapetal cells and tetrads, and the fluorescence was strong in the nucleus. **(B)** *ProGPR1:GPR1-EGFP* expression during pollen development. Nucleus was visualized by DAPI staining. Note GFP signal overlapped with DAPI only in vegetative nucleus of bicellular pollen grain.

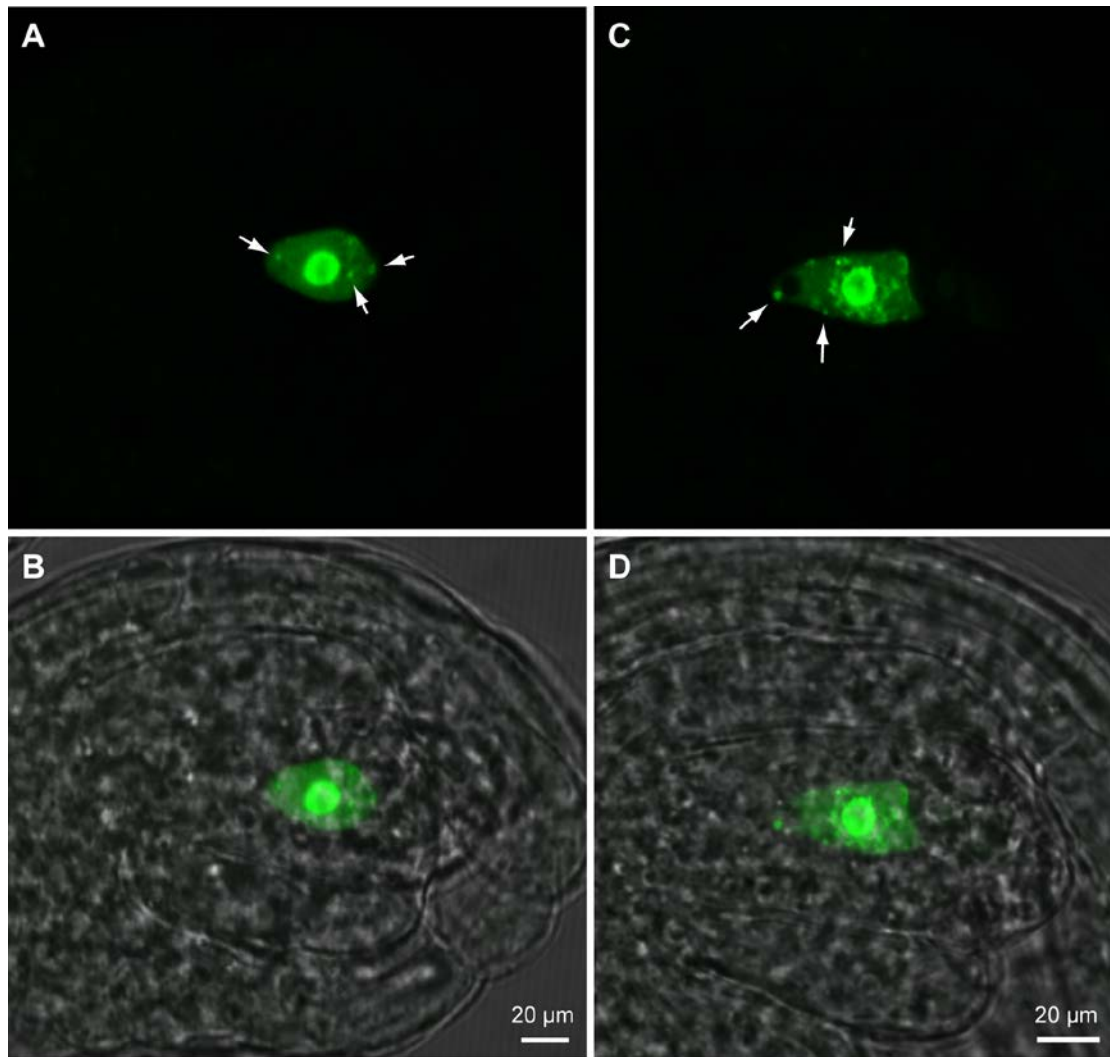

**Supplemental Figure S4.** Subcellular localization of GPR1-EGFP in female gametophyte. (A-D) Ovules at FG1 stage from *ProGPR1:GPR1-EGFP* transgenic plants were observed using confocal laser scanning microscope. Shown are GPR1-EGFP images (A, C) and merged images of GFP channel and bright field (B, D). Arrows indicate punctate structures.

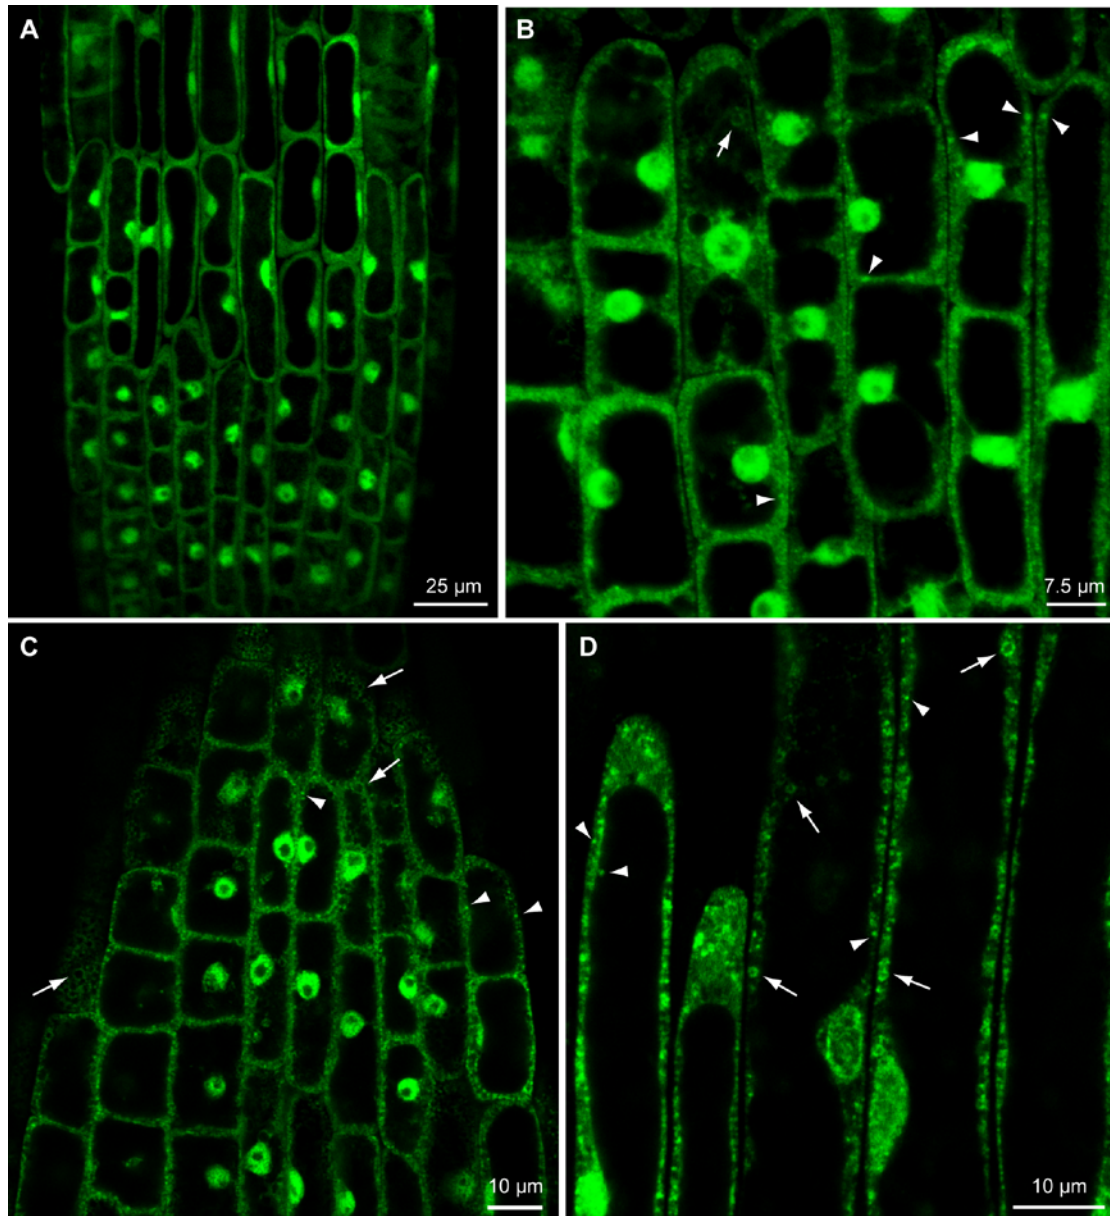

**Supplemental Figure S5.** Subcellular localization of EGFP-GPR1 in Arabidopsis root tip cells. (A) Confocal image of root tip of *Pro35S:EGFP-GPR1* seedling. (B, C) Enlarged image of root tip cells in the transition zone. (D) Enlarged image of root tip elongated cells. Note fluorescence was detected in cytoplasm and nucleus. Arrowheads indicate punctate structures; arrows indicate ring-like structures.

**A**

```

NtS2      YIGICSLAGSLTVMGVKAIGIAMKLTFGGQNFKYFETWFFIIFVLIFCLLQ----- 52
GPR1      -----MEK--NIFKKISAVVPTELDFAIRFEYQIPNCTLI-PDRVCHDDISDIRQKY 51
          :   .::   :   :   :*: *   :*: *   :*   .*   :

NtS2      -----LNYLNKALDTFNT-AVVSPIYYVM-----FTTL-----TIVA 83
GPR1      AVKVMASAGTTLSNKLNDVLHEEPCVRHLDPVYASLLHQRYNMYHYDRAVRQVSVTQTLVN 111
          * **..* *   :. :*: *   :   :   :*: *

NtS2      SM-IMFKDYVHQNATQIIITELCGFVTIL-----C----- 111
GPR1      VMSFNYYDLLRKDDDCDSRDKCRSLGVTALARMLTFAKSCIPALNLLDQVREFMASVEDD 171
          * : : * : : :   : * : :   *

NtS2      --GTFLLHKTDMGSNPSKPIPVLLPKTDTCKPTSETTKIPAEV----- 154
GPR1      AAATSLVNKYSDVLPPEKYPFPDIVWEDEADFDVDPETLLLVEELDRRYELWLKGGSHI 230
          .* *: * .*:   . *.* : : : *   ** : * :

```

**B**

```

NtS2      ----- 0
AT3G23870 MDQMSPDNINGVILAVSSSIFIGSSFIIKKKGLKKAGASGVRAGEGGYGYLKEPWWWAGM 60

NtS2      ----- 0
AT3G23870 ITMIVGEVANFAAYAFAPAILVTPLGALSII FSAVLAHFILKEKLHMFILGCILCVVGS 120

NtS2      -----YIG 3
AT3G23870 TTIVLHAPHEQKIESVKQIWQLAIEPGFLVYSAVIVIVVAILIFYYPEPRYGKTHMIVVVG 180
          *: *

NtS2      ICSLAGSLTVMGVKAIGIAMKLTFGGQNFKYFETWFFIIFVLIFCLLQNYLNKALDTF 63
AT3G23870 ICSLMGSLTVMGVKAVAIKLTFSGTNQFKYFNTWIFILVWATCCILQINYNKALDTF 240
          **** *****.***:.**:*:***,* *****;*:*:*. *   *:*:*****

NtS2      NTAVVSPIIYYVMFTTLTIVASMIMFKDYVHQNATQIIITELCGFVTILCGTFLHKTDMG 123
AT3G23870 NTAVISPVYYVMFTTFTIIASMIMFKDWASQSLKIIATELCGFVTILSGTFLHKTDMG 300
          *****:**:*:*****:***:*****:.. *.. :* *****.*****

NtS2      SNPSKPIPVLLPKTDTCKPTSETTKIPAEV----- 154
AT3G23870 NSASGRGSISMPTRTDPVFTNSGSGRSSSSDKVAS 335
          .. *   : :*. **   .* : : :.

```

**Supplemental Figure S6.** Amino acid sequence alignment of NtS2, GPR1 and At3g23870 proteins. **(A)** Amino acid sequence alignment of NtS2 and GPR1. **(B)** Amino acid sequence alignment of NtS2 and At3g23870. The alignment was performed online at <http://www.ebi.ac.uk/Tools/msa/clustalo/>.

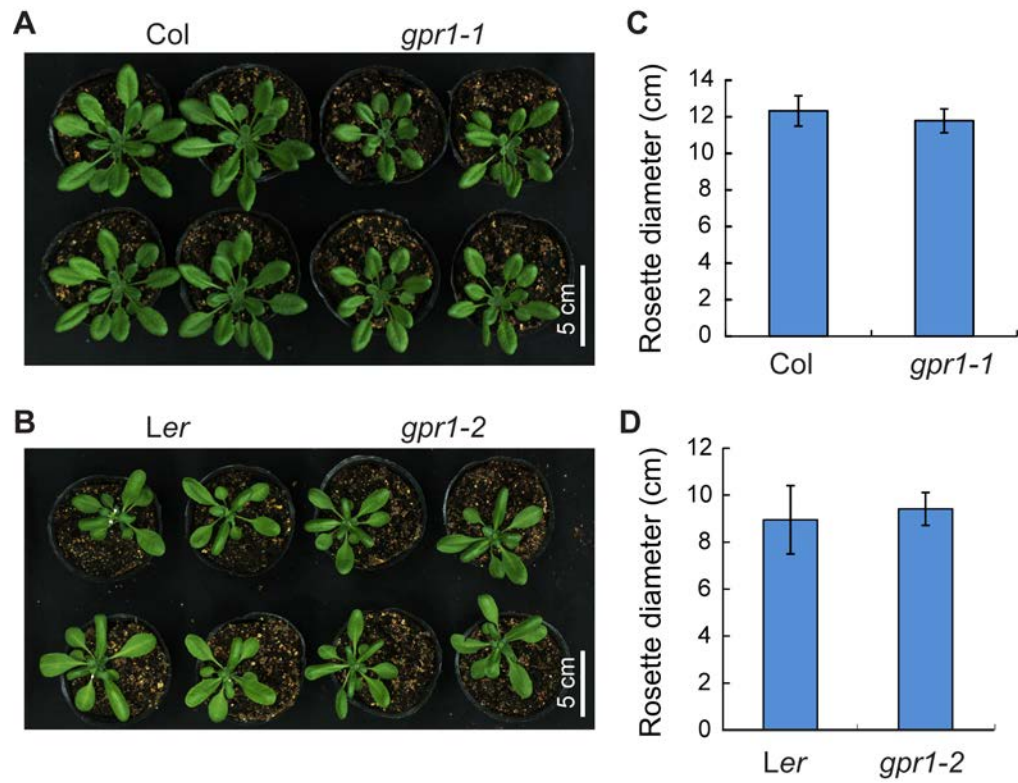

**Supplemental Figure S7.** Phenotypes of *gpr1* mutants. (**A, B**) Rosette of 4-week-old plants. (**C, D**) Rosette diameter of 5-week-old plants. The data are presented as means  $\pm$  SD (n = 8, no significant differences between *gpr1* mutants and wild type by Student's *t* test).

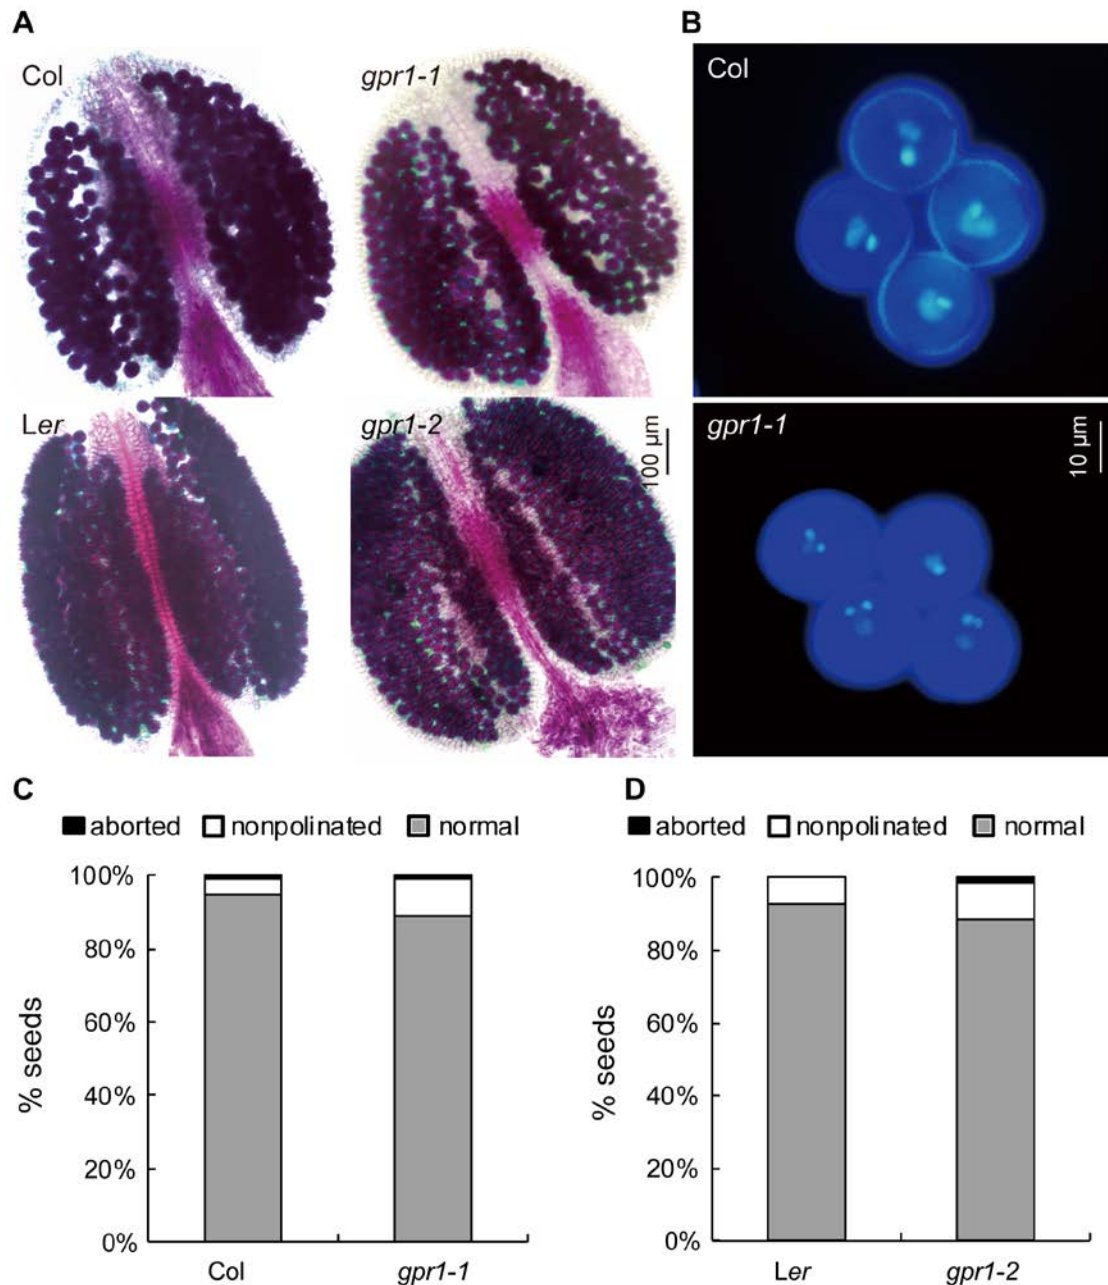

**Supplemental Figure S8.** Viability analysis of *gpr1* pollen grain. (A) Alexander stained anthers from wild-type and *gpr1* plants. Pollen with normal viability was stained in purple. (B) DAPI stained pollen grains. (C, D) Quantification of seed setting after crossing with *ms1-1*. *ms1-1* pistils were hand-pollinated with pollen grains from wild-type or *gpr1* plants. Siliques were harvested at 10 d after pollination and the seeds were counted. The data are presented as means  $\pm$  SD ( $n = 8$  siliques for each crossing, no significant differences between *gpr1* mutants and wild type by Student's *t* test).

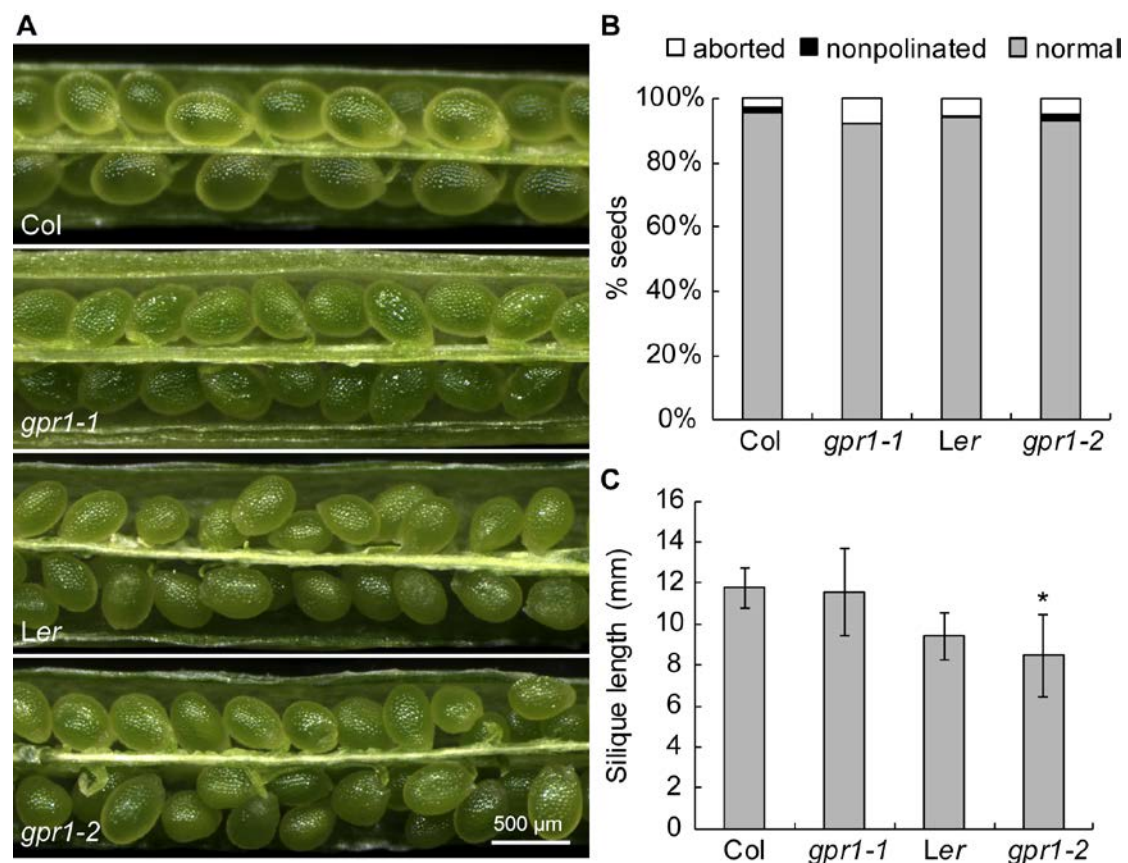

**Supplemental Figure S9.** Seed setting of *gpr1* mutants. **(A)** Siliques 10 d after pollination from wild-type and *gpr1* mutants. **(B, C)** Quantification of normal and aborted seeds and unpollinated ovules, and silique length. The results are presented as means  $\pm$  SD ( $n = 18$  siliques for each genotype). Differences between the wild-type and mutants are significant at  $P < 0.05$  (\*) by Student's  $t$  test.

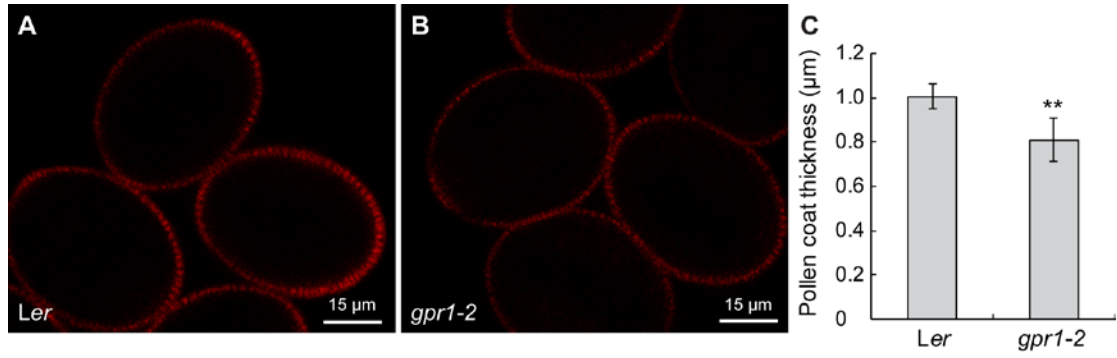

**Supplemental Figure S10.** Pollen coat analysis of *gpr1-2* mutant. (A, B) Fluorescent images taken using a TRITC filter for autofluorescent (red) of pollen coat in *Ler* (A) and *gpr1-2* (B). (C) Pollen coat thickness of *Ler* and *gpr1-2*. The data are presented as means  $\pm$  SD ( $n = 81$  for each genotype, \*\*  $P < 0.01$  by Student's  $t$  test).

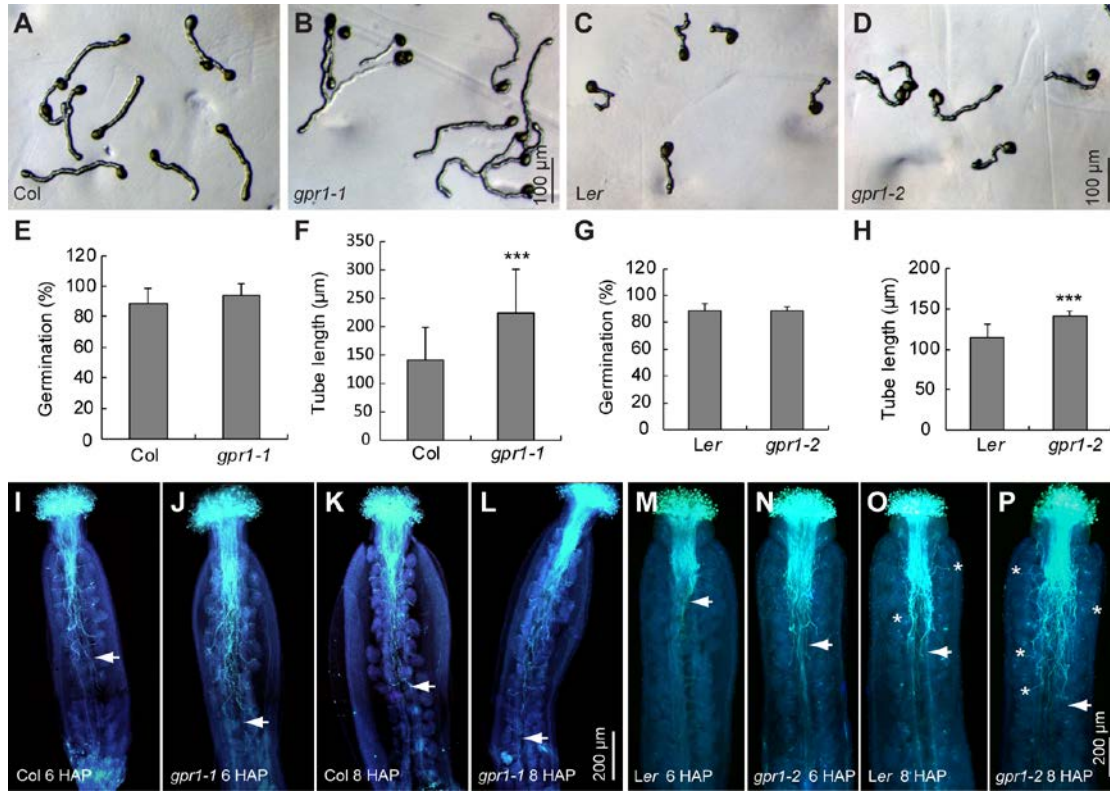

**Supplemental Figure S11.** In vitro and in vivo pollen germination analysis of *gpr1* mutants. (A-D) Pollen grains from Col (A), *gpr1-1* (B), *Ler* (C) and *gpr1-2* (D) incubated on germination medium for 8 h. (E-H) Pollen germination percentage (E, G) and pollen tube length (F, H) at 8 h ( $n = 1390-1674$  for Col and *gpr1-1*,  $n = 170-250$  for *Ler* and *gpr1-2*; \*\*\*  $P < 0.001$  by Student's  $t$  test). (I-L) Aniline blue staining of Col pistil 6 h or 8 h after hand pollination with either Col (I, K) or *gpr1-1* pollen grains. (M-P) Aniline blue staining of *Ler* pistil 6 h or 8 h after hand pollination with either *Ler* (M, O) or *gpr1-2* (N, P) pollen grains. Arrows indicate pollen tubes in transmitting tracts. Asterisks indicate pollen tubes that invade the ovule.

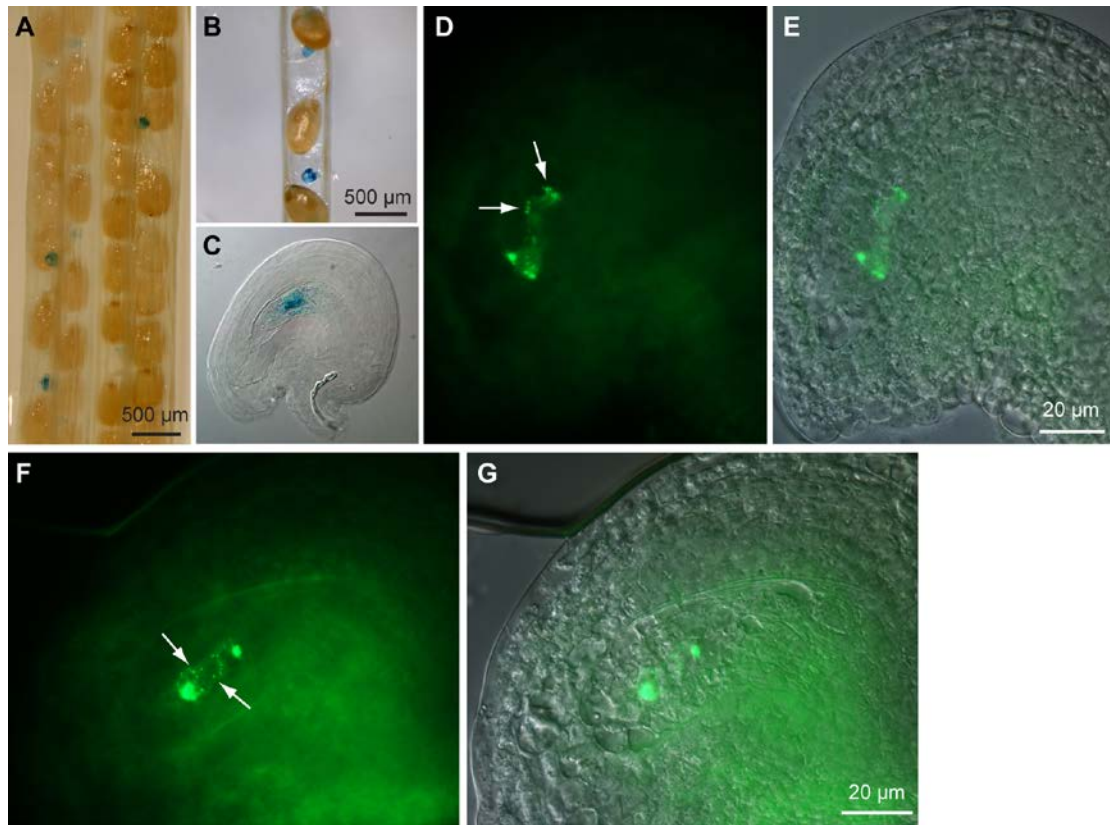

**Supplemental Figure S12.** Strong *ProGPRI:GUS* or *ProGPRI:GPRI-EGFP* signals were detected in unpollinated or aborted ovules. **(A, B)** *ProGPRI:GUS* siliques, showing GUS signals in unpollinated ovules. **(C)** An aborted ovule from stage 13 flower. Note strong GUS staining in the center of the embryo sac. **(D-G)** Fluorescence **(D, F)** and merged **(E, G)** images of aborted ovules from stage 13 flower of *ProGPRI:GPRI-EGFP* plants. Note strong fluorescent signals in the degenerated embryo sac. Arrows indicate punctate structures.

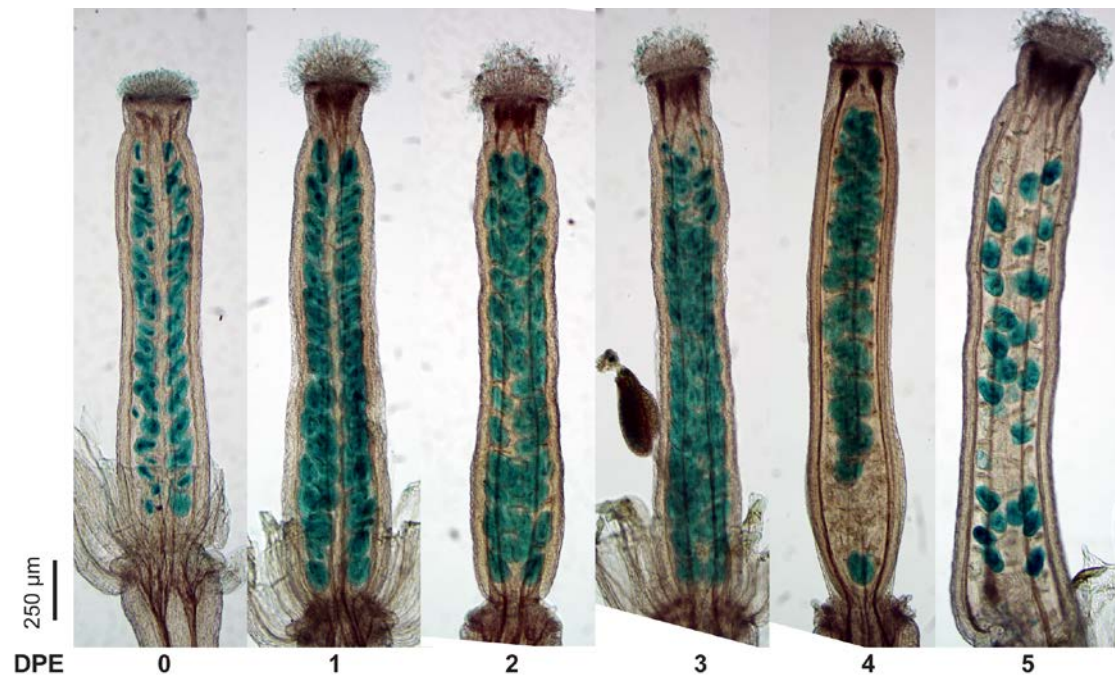

**Supplemental Figure S13.** Expression of *ProGPR1:GUS* in unfertilized pistils. At 0 to 3 day post emasculature (DPE), GUS activity was detectable in ovules of the whole pistil. At 4 DPE, GUS signal was absent in ovules located in the base of the pistil, and this trend progressed acropetally on the next day.

**Supplemental Table S1.** Primers used in this study.

| Primer Purpose           | Primer name       | sequence 5'→ 3'                        |
|--------------------------|-------------------|----------------------------------------|
| Genotyping               | LBa1              | TGGTTCACGTAGTGGGCCATC                  |
|                          | Ds5-1             | ACGGTCGGGAAACTAGCTCTAC                 |
|                          | GPR1_gF_386       | GAAAGGACGATGATTGCGACTC                 |
|                          | GPR1_gR_1402      | CTGCCATTGAAGGATAAGAACTAA               |
| GPR1 promoter cloning    | GPR1_F_-2567_XhoI | GCCCTCGAGCAGCCAGAAATATGAAACTATCCCA     |
|                          | GPR1_R_-1_SpeI    | GCATACTAGTTGTTCCACAACGAACCATCTTGAAT    |
| GPR1 terminator cloning  | GPR1_F_694_NotI   | GTAAGCGGCCCGCGGAACCCATTCCAATTTAAACCTCA |
|                          | GPR1_R_1112_SacI  | GCTGGAGCTCGCCAGAGCAGAGGAACCAATAGTGT    |
| GPR1 genomic DNA cloning | GPR1_F_-2567_XhoI | GCCCTCGAGCAGCCAGAAATATGAAACTATCCCA     |
|                          | GPR1_R_690_SpeI   | CCATACTAGTTATATGGCTTCCACCTTTGAGCCAG    |
| GPR1 cDNA cloning        | GPR1_gF_1_EcoRI   | ATATGAATTCATGGAGAAGAACATATTCAAGAAGA    |
|                          | GPR1_gR_693_BamHI | ATATGGATCCTTATATATGGCTTCCACCTTTGAGC    |
| GPR1 RT-PCR              | GPR1_cF_28        | AGTGCTGTGGTTCCGACTGAATT                |
|                          | GPR1_cR_668       | CAGAGTTCATATCGACGATCCAA                |
| APT1 RT-PCR reference    | APT1_F_456        | GTTGAATGTGCTTGCG                       |
|                          | APT1_R_804        | CTTTAGCCCCTGTTGG                       |

Introduced restriction enzyme sites are underlined.
